# Supplementary material for: Silencing Acetyl-CoA carboxylase A (ACACA) and Sterol Regulatory Element-binding Protein 1 (SREBP1) Genes Through RNAi Reduce Cholesterol Content in Serum and Eggs of Transgenic Chicken
Source: Research Square preprint supplement (doi:10.21203/rs.3.rs-660591/v1), 2021-07-01
Supplement: Supplementary file 1 [file 2a1c15b00e2431cb7917bca9.docx]

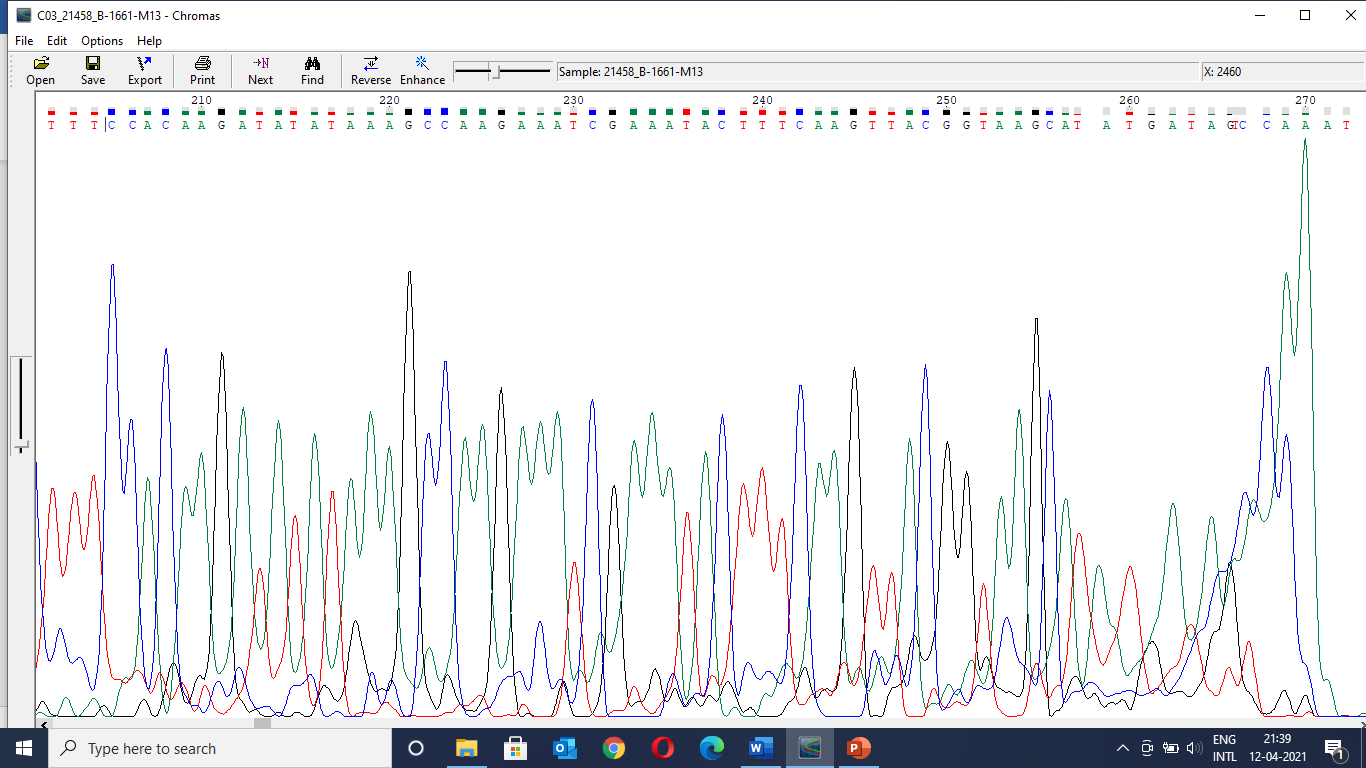


Vector sequence: TTTCGTCCTTTCCACAAGATATATAAAGCCAAGAAATCGAAATACTTTCAAGTTACGGTAAGCATATGATAGTCCA

**Bird No. 1661**

**Bird No. 5330**


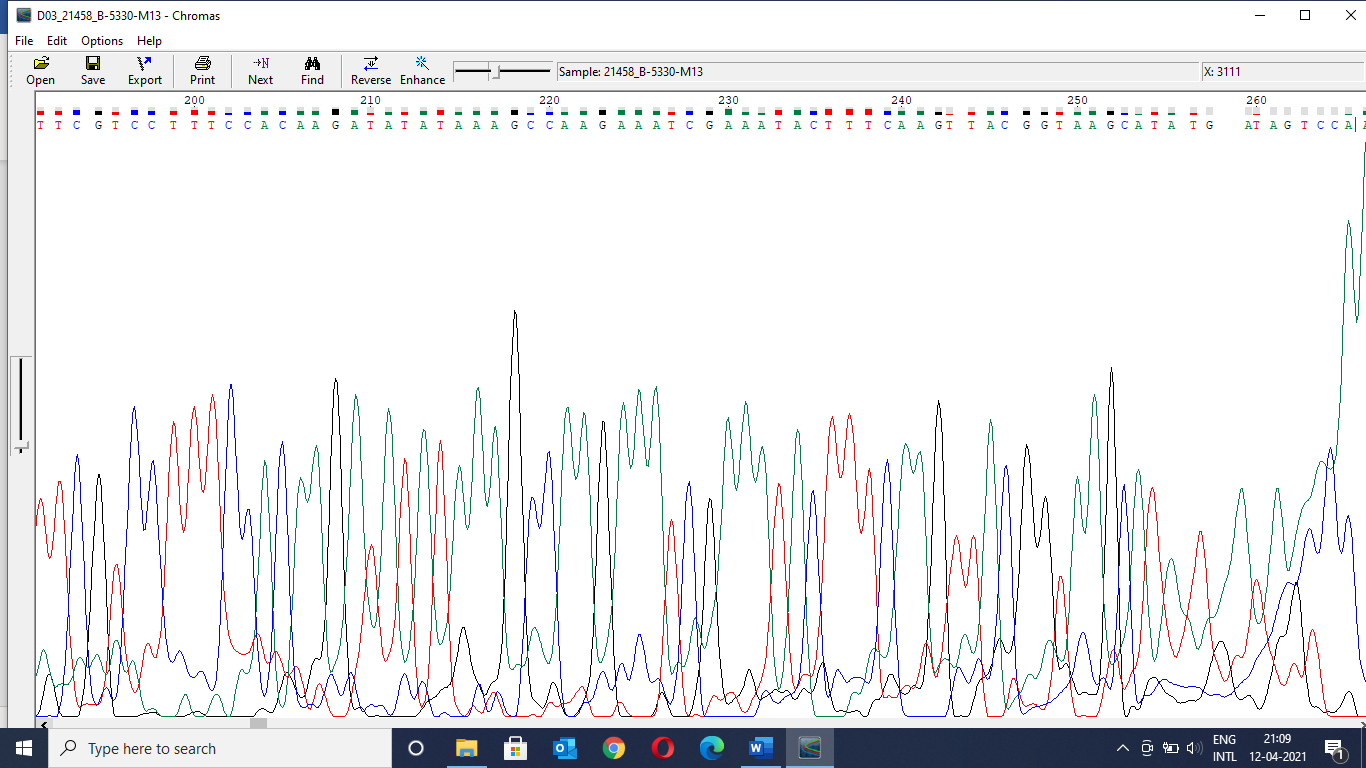

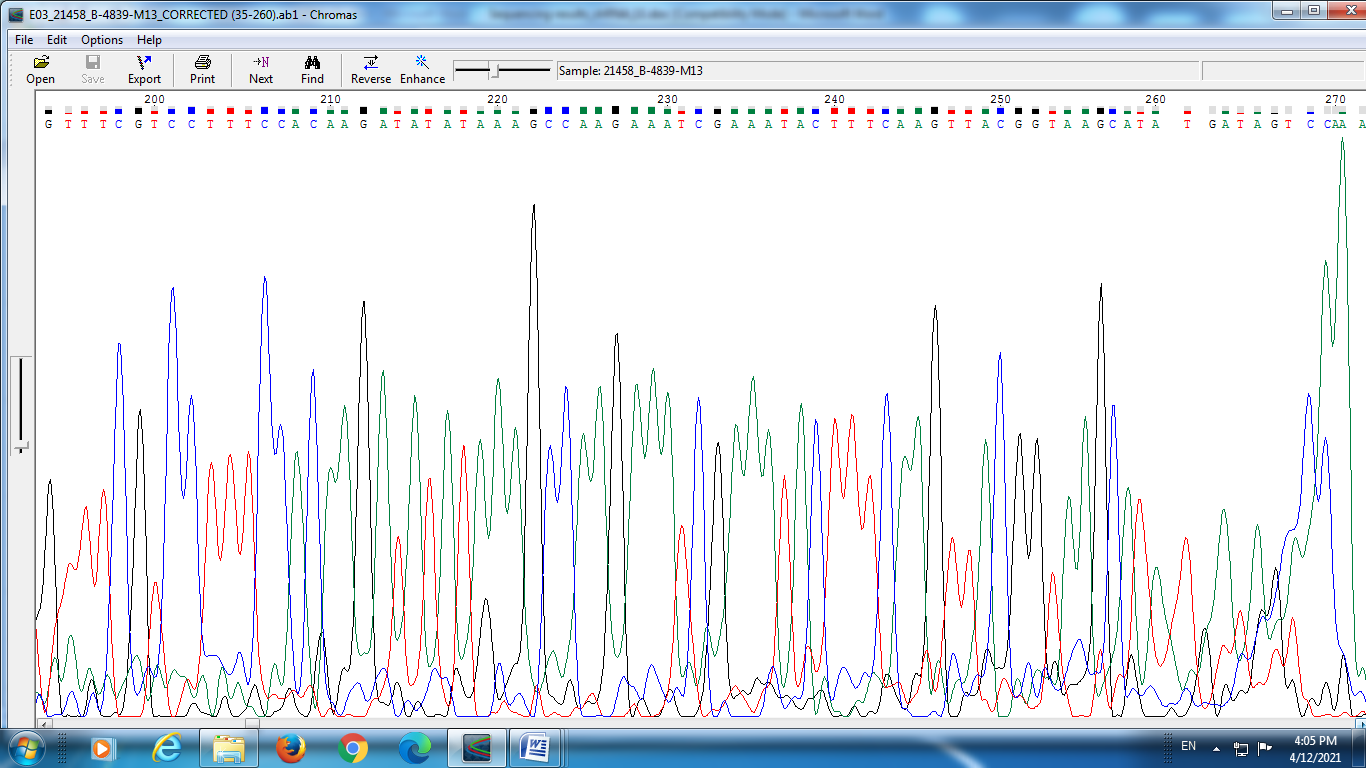


**Bird No. 4839**


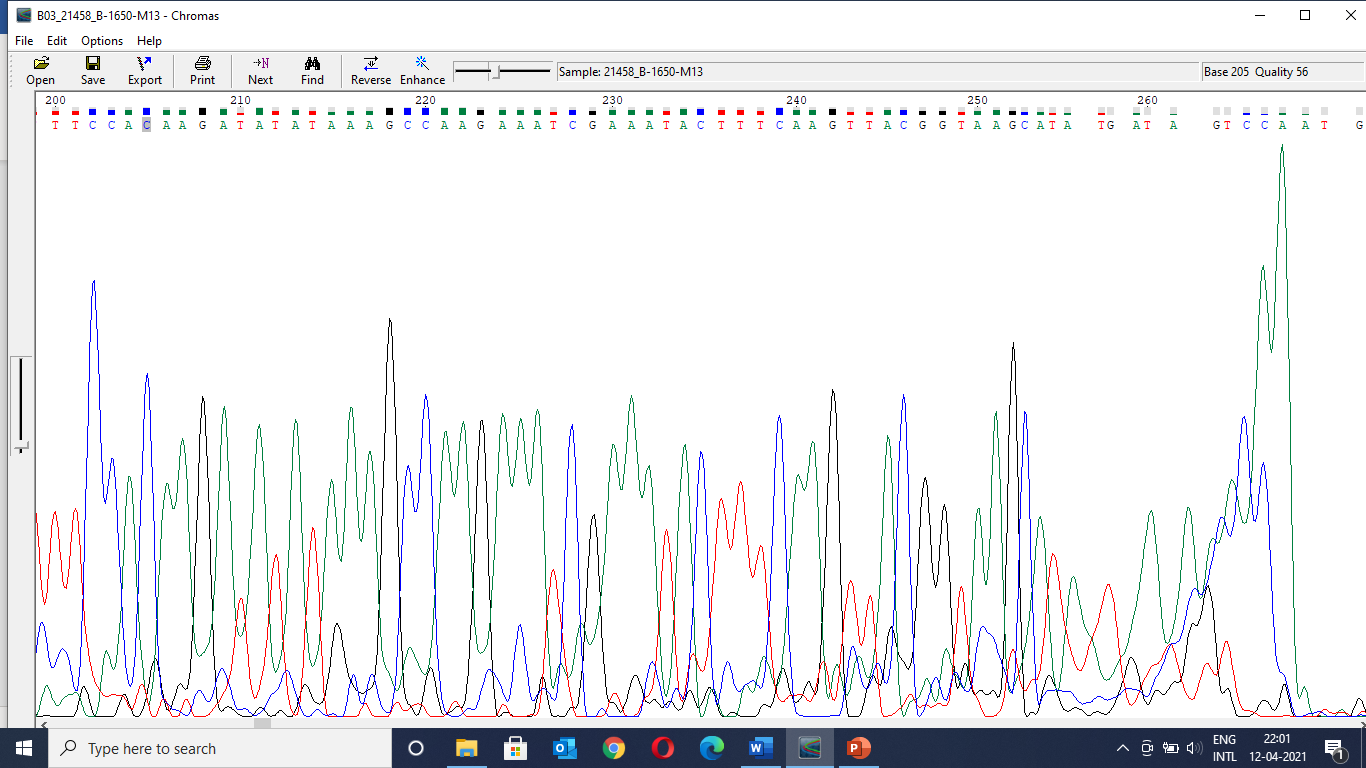


**Bird No. 1650**


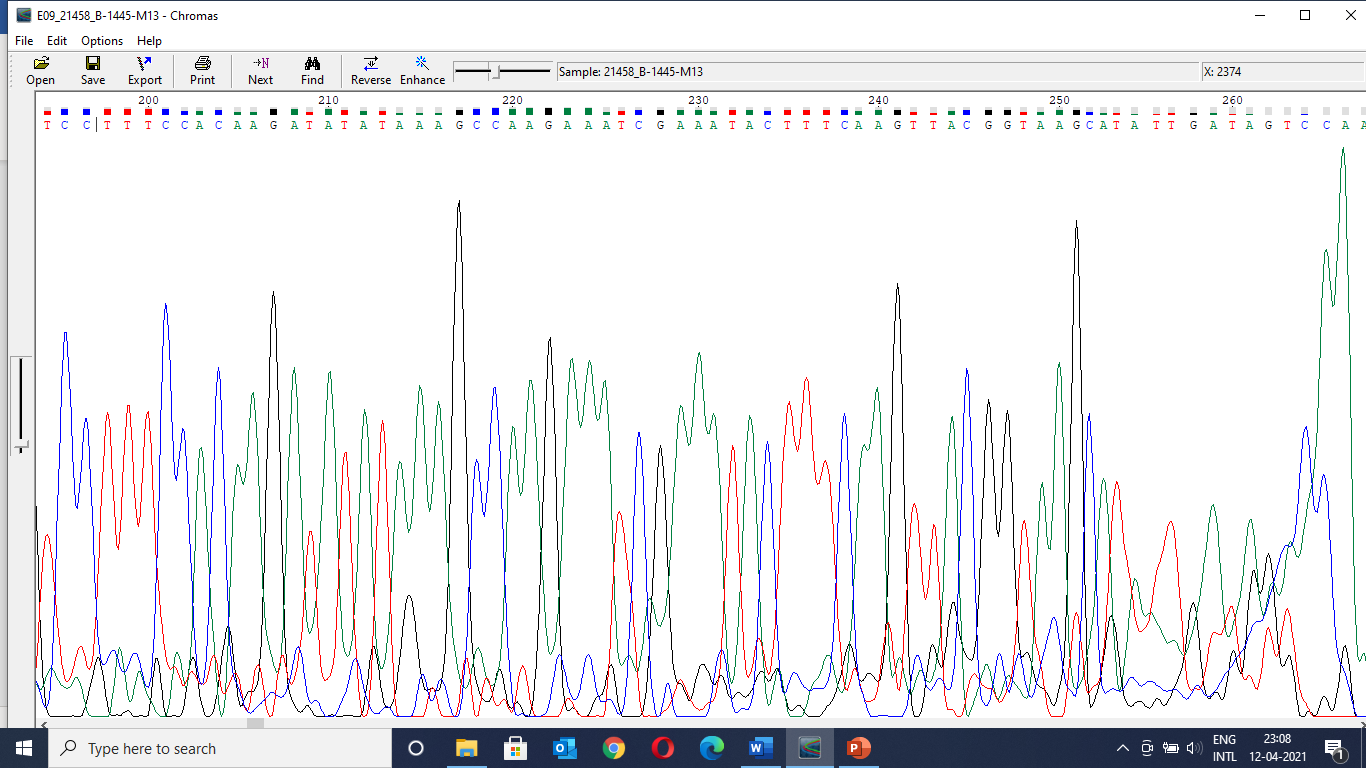


**Bird No. 1445**


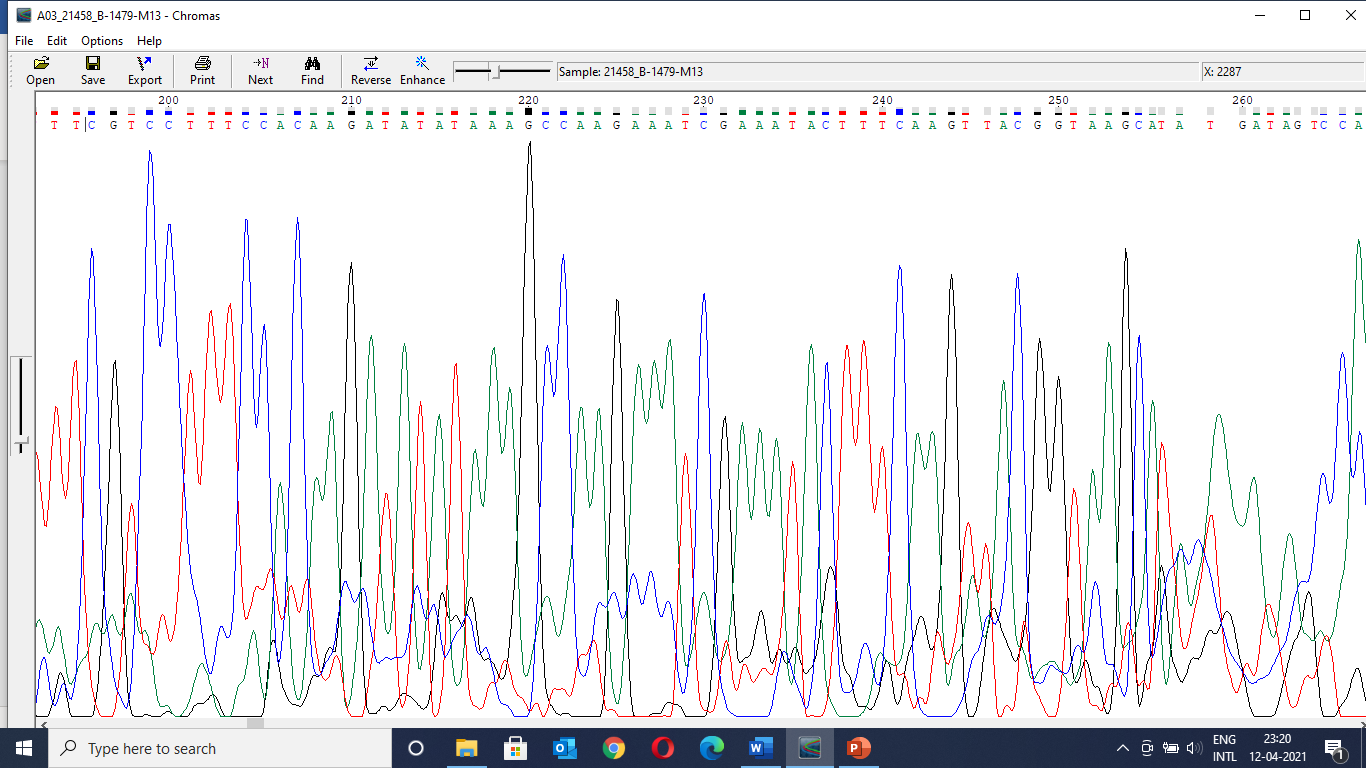


**Bird No. 1479**

Supplementary Figure 1. DNA sequence of entry vector fragment amplified from transgenic birds. Primer sequence has been under lined. Entry vector fragment sequence has been mentioned on top of chromatogram of Bird No. 4839. Presence of vector sequence in the bird indicates integration of entry vector in the genome of the transgenic birds.
